# Supplementary material
Source: MDPI journal article supplement (https://www.mdpi.com/2673-6489/1/1/3)
Supplement: s1 [file s1]

## Sheet: TableS1
	INCOME FROM ASGM ACTIVITIES PER FORTNIGHT
	S/N	ASGM Income Per Fortnight(MWK)	ASGM Income per Fortnight (USD)
	1
	2
	3
	4
	5	8000	10.8108
	6	9000	12.1622
	7	10000	13.5135
	8	10000	13.5135			Table: S1; Statistical parameters
	9	10000	13.5135
	10	10000	13.5135			STATISTICAL PARAMETERS	VALUE (MWK)	VALUE (USD)
	11	20000	27.027			AVERAGE	22494.9	30.3985
	12	10000	13.5135			STD DEVIATION	24723.2	33.4097
	13	7500	10.1351			MEDIAN	20000	27.027
	14	20000	27.027			RANGE	1500 to 165,000	2USD to 223USD
	15	8000	10.8108
	16	Cannot quantify because the job is abit complex in pricing, hence only do to meet the immediate problems	#VALUE!
	17	27000	36.4865
	18	32500	43.9189			KEY
	19	7000	9.45946			MWK	Malawin Kwacha
	20	21000	28.3784			USD	United States Dollrs
	21	5000	6.75676
	22	25000	33.7838
	23	20000	27.027
	24	8000	10.8108
	25	12000	16.2162
	26	5000	6.75676
	27	8000	10.8108
	28	30000	40.5405
	29	5000	6.75676
	30	6000	8.10811
	31	50000	67.5676
	32	60000	81.0811
	33	20000	27.027
	34	20000	27.027
	35	5000	6.75676
	36	30000	40.5405
	37	60000	81.0811
	38	30000	40.5405
	39	8000	10.8108
	40	7000	9.45946
	41	10000	13.5135
	42	45000	60.8108
	43	20000	27.027
	44	7000	9.45946
	45	10000	13.5135
	46	7400	10
	47	6000	8.10811
	48	6000	8.10811
	49	3000	4.05405
	50	30000	40.5405
	51	20000	27.027
	52	35000	47.2973
	53	50000	67.5676
	54	20000	27.027
	55	FIRST TIME NO INCOME GENERATED YET	#VALUE!
	56	8000	10.8108
	57	10000	13.5135
	58	10000	13.5135
	59	70000	94.5946
	60	1500	2.02703
	61	10000	13.5135
	62	70000	94.5946
	63	10000	13.5135
	64	15000	20.2703
	65	50000	67.5676
	66	20000	27.027
	67	15000	20.2703
	68	90000	121.622
	69	45000	60.8108
	70	10000	13.5135
	71	30000	40.5405
	72	NO SALES YET	#VALUE!
	73	4000	5.40541
	74	N/A	#VALUE!
	75	7000	9.45946
	76	15000	20.2703
	77	5000	6.75676
	78	10000	13.5135
	79	12500	16.8919
	80	10000	13.5135
	81	7500	10.1351
	82	4000	5.40541
	83	5000	6.75676
	84	20000	27.027
	85	15000	20.2703
	86	30000	40.5405
	87	20000	27.027
	88	10000	13.5135
	89	4000	5.40541
	90	15000	20.2703
	91	50000	67.5676
	92	40000	54.0541
	93	20000	27.027
	94	20000	27.027
	95	28000	37.8378
	96	20000	27.027
	97	16000	21.6216
	98	20000	27.027
	99	20000	27.027
	100	30000	40.5405
	101	20000	27.027
	102	20000	27.027
	103	20000	27.027
	104	20000	27.027
	105	165000	222.973
	106	55000	74.3243
	107	165000	222.973
	108	4000	5.40541
	109	10000	13.5135
	110	20000	27.027
	111	30000	40.5405
	112	15000	20.2703
	113	20000	27.027
	114	5000	6.75676
	115	4000	5.40541
	116	1500	2.02703
	117	50000	67.5676
	118	40000	54.0541
	119	20000	27.027
	120	16000	21.6216
	121	30000	40.5405
	122	20000	27.027
	123	28000	37.8378
	124	20000	27.027
	125	20000	27.027
	126	20000	27.027

## Sheet: Table S2
	INCOME PER FORTNIGHT FROM OTHER OCCUPATIONS (INCLUDING FARMING)
	S/N	Income (Fortnight indicated as Direct Amounts and farm products are yearly incomes)	Equivalent MWK	Equivalent USD	Income per Fortnight (USD)	Income per Fortnight (MWK)
	1
	2
	3
	4	N/A
	5	3000	3000	4.05405	4.05405	3000			Table: S2; Statistical parameters
	6	7000	7000	9.45946	9.45946	7000			STATISTICAL PARAMETER	VALUE (MWK)	VALUE (USD)
	7	12000	12000	16.2162	16.2162	12000			AVERAGE	7929.7	10.7158
	8	10000	10000	13.5135	13.5135	10000			STANDARD DEVIATION	12512.6	16.9089
	9	CANNOT EXPLAIN	N/A	N/A	N/A	N/A
	10	15000	15000	20.2703	20.2703	15000			MEDIAN	4492.5	6.07095
	11	7000	7000	9.45946	9.45946	7000
	12	40000	40000	54.0541	54.0541	40000			RANGE	185.00 to 80,000.00	0.25USD to 108USD
	13	7500	7500	10.1351	10.1351	7500
	14	5000	5000	6.75676	6.75676	5000
	15	5000	5000	6.75676	6.75676	5000
	16	Sells only to satisfy immediate problem like buying soap	N/A	N/A	N/A	N/A
	17	8000	8000	10.8108	10.8108	8000			KEY
	18	21000	21000	28.3784	28.3784	21000			MWK	Malawin Kwacha
	19	6000	6000	8.10811	8.10811	6000			USD	United States Dollrs
	20	3 BAGS OF MAIZE AND 3 BAGSOF G/NUTS	45000	60.8108	2.33888	1730.77
	21	6 BAGS OF MAIZE, 1BAG OF SOYA AND 2BAGS OF G/NUTS	68000	91.8919	3.5343	2615.38
	22	17 BAGS OF MAIZE, 5 BAGS OF SHELLED G/NUTS	327000	441.892	16.9958	12576.9			Item	Approximate Price per Bag	Source
	23	NO IDEA	N/A	0	N/A	N/A			Bag of Maize (50kg)	6000	Trading prices
	24	12 BAGS OF MAIZE, 2 BAGS OF G/NUTS AND 1BAG OF SOYA	104000	140.541	5.40541	4000			Bag of unshelled G/Nuts (50kg)	9000	Local trading prices
	25	2 BAGS OF MAIZE	12000	16.2162	0.623701	461.538			Bag of Soya Beans (50Kg)	14000	Local trading prices
	26	12 BAGS MAIZE, 5 BAGS G/NUTS	117000	158.108	6.08108	4500			Bag of shelled G/Nuts (50kg)	45000	Local trading prices
	27	7 BAGS MAIZE, 1 BAG G/NUTS, 1 BAG SOYA	65000	87.8378	3.37838	2500			1 Bale of Tobacco	250046	http://www.tccmw.com/tc/sales/
	28	3 BAGS OF MAIZE	18000	24.3243	0.935551	692.308			1 Bag of Beans (50Kg)	28000
	29	4 BAGS OF MAIZE, 1 BALE OF TOBACCO	24000	32.4324	1.2474	923.077			1kg of cotton (1.53 USDper Kg)	56610	https://www.selinawamucii.com/insights/prices/malawi/cotton/
	30	30 BAGS OF MAIZE, 20 BAGS OF G/NUTS, 1BAG OF BEANS	388000	524.324	20.1663	14923.1			1 Bag of Rice (50Kg)	40000
	31	NONE	N/A	N/A	N/A	N/A			3 tins of produce (is measured as 50kg)		Trading practice (substitute for accurate mass scales)
	32	2 BAGS OF MAIZE, 2 BALES OF TOBACCO	12000	16.2162	0.623701	461.538
	33	6 BAGS OF MAIZE, 1BAG OF G/NUTS AND 110 KG OF TOBACCO	171170	231.311	8.89657	6583.46
	34	4 BAGS OF MAIZE	24000	32.4324	1.2474	923.077
	35	3 BAGS OF MAIZE	18000	24.3243	0.935551	692.308
	36	200000 PER YEAR	200000	270.27	10.395	7692.31
	37	400000 PER YEAR	400000	540.541	20.79	15384.6
	38	400000 PER YEAR	400000	540.541	20.79	15384.6
	39	40000 PER YEAR	400000	540.541	20.79	15384.6
	40	HARVEST ABOUT 8 BAGS OF MAIZE	48000	64.8649	2.4948	1846.15
	41	200000 PER YEAR	200000	270.27	10.395	7692.31
	42	250000 PER YEAR	250000	337.838	12.9938	9615.38
	43	150000 PER YEAR	150000	202.703	7.79626	5769.23
	44	9 BAGS OF MAIZE PER YEAR	54000	72.973	2.80665	2076.92
	45	2 BAGS/YEAR DUE TO LACK OF CAPITAL	12000	16.2162	0.623701	461.538
	46	4800	4800	6.48649	0.24948	184.615
	47	8 BAGS OF G/NUTS AND 14 BAGS OF MAIZE PER YEAR	444000	600	23.0769	17076.9
	48	HARVEST 7 BAGS OF MAIZE PER YEAR	42000	56.7568	2.18295	1615.38
	49	HARVEST 6 BAGS OF MAIZE PER YEAR	36000	48.6486	1.8711	1384.62
	50	10000	10000	13.5135	0.519751	384.615
	51	10 BAGS OF MAIZE (MK5000/BAG) AND 5 BAGS OF G/NUTS (MK8000/BAG)	105000	141.892	5.45738	4038.46
	52	4 BAGS PER YEAR	24000	32.4324	1.2474	923.077
	53	10 BAGS OF MAIZE AND 15 BAGS OF G/NUTS (MK6000/BAG)	195000	263.514	10.1351	7500
	54	6 BAGS OF MAIZE	36000	48.6486	1.8711	1384.62
	55	700000 PER YEAR	70000	94.5946	3.63825	2692.31
	56	5 BAGS OF MAIZE AND 2 BAGS OF BEANS	58000	78.3784	3.01455	2230.77
	57	9 BAGS OF MAIZE AND 5 BAGS OF G/NUTS	99000	133.784	5.14553	3807.69
	58		0	0	N/A	N/A
	59	NON-COMMERCIAL	NA	N/A	N/A	N/A
	60	N/A	N/A	N/A	N/A	N/A
	61	N/A	N/A	N/A	N/A	N/A
	62	15000	15000	20.2703	20.2703	15000
	63	NON-COMMERCIAL	N/A	N/A	N/A	N/A
	64	SUBSISTENCE	N/A	N/A	N/A	N/A
	65	NOT COMMERCIAL	N/A	N/A	N/A	N/A
	66	10000	10000	13.5135	13.5135	10000
	67	SUBSISTENCE	N/A	N/A	N/A	N/A
	68	10000	10000	13.5135	13.5135	10000
	69	10000	10000	13.5135	13.5135	10000
	70	2500	2500	3.37838	3.37838	2500
	71	NON-COMMERCIAL	N/A	N/A	N/A	N/A
	72	NON-COMMERCIAL	N/A	N/A	N/A	N/A
	73	N/A	N/A	N/A	N/A	N/A
	74	NOT YET IDENTIFIED	N/A	N/A	N/A	N/A
	75	5000	5000	6.75676	6.75676	5000
	76	6000 FROM PIECEWORK	6000	8.10811	8.10811	6000
	77		0	0	N/A	N/A
	78	7000	7000	9.45946	9.45946	7000
	79	7500	7500	10.1351	10.1351	7500
	80	7000	7000	9.45946	9.45946	7000
	81	1500	1500	2.02703	2.02703	1500
	82	3 BAGS OF MAIZE PER YEAR	18000	24.3243	24.3243	18000
	83	6BAGS OF MAIZE PER YEAR	36000	48.6486	48.6486	36000
	84	NONE	NONE	N/A	N/A	N/A
	85	25 BAGS OF MAIZE PER YEAR	150000	202.703	7.79626	5769.23
	86	2 BAGS OF MAIZE PER YEAR	12000	16.2162	0.623701	461.538
	87	15 BAGS OF MAIZE/YR	90000	121.622	4.67775	3461.54
	88	10 BAGS OF MAIZE, 1 BAG COTTON	60000	81.0811	3.1185	2307.69
	89	4250	4250	5.74324	5.74324	4250
	90	N/A	N/A	#VALUE!	N/A	N/A
	91	3000	3000	4.05405	4.05405	3000
	92	3000	3000	4.05405	4.05405	3000
	93	1500	1500	2.02703	2.02703	1500
	94	80000	80000	108.108	108.108	80000
	95	1 BAG PER YR	6000	8.10811	0.31185	230.769
	96	2 BAGS MAIZE, 2 TINS BEANS, 5 TINS RICE (approx 1.5 of 50kg)	100000	135.135	5.19751	3846.15
	97	15 TINS MAIZE, 15 TINS RICE, 4 TINS BEANS	277600	375.135	14.4283	10676.9
	98	30 TINS OF MAIZE, 12 TINS RICE	220000	297.297	11.4345	8461.54
	99	3 TINS BEANS, 5 BAGS MAIZE, 1 BAG RICE	98000	132.432	5.09356	3769.23
	100	1.5 TINS BEANS, 3 BAGS MAIZE, 5 BAGS RICE	232000	313.514	12.0582	8923.08
	101
	102
	103
	104
	105
	106
	107
	108	4250	4250	5.74324	5.74324	4250
	109	10 BAGS OF MAIZE, 1 BAG COTTON	116610	157.581	6.06081	4485
	110	15 BAGS OF MAIZE/YR	90000	121.622	4.67775	3461.54
	111	2 BAGS OF MAIZE PER YEAR	12000	16.2162	0.623701	461.538
	112	25 BAGS / YEAR	150000	202.703	7.79626	5769.23
	113	NONE	N/A	N/A	N/A	N/A
	114	6 BAGS/YEAR	36000	48.6486	1.8711	1384.62
	115	3 BAGS/YR	18000	24.3243	0.935551	692.308
	116	N/A	N/A	N/A	N/A	N/A
	117	3000	3000	4.05405	4.05405	3000
	118	3000	3000	4.05405	4.05405	3000
	119	1500	1500	2.02703	2.02703	1500
	120	15 TINS MAIZE, 15 TINS RICE, 4 TINS BEANS	266400	360	13.8462	10246.2
	121	1.5 TINS BEANS, 3 BAGS MAIZE, 5 BAGS RICE	232000	313.514	12.0582	8923.08
	122	80000	80000	108.108	108.108	80000
	123	1 BAG PER YR	6000	8.10811	0.31185	230.769
	124	2 BAGS MAIZE, 2 TINS BEANS, 5 TINS RICE	99600	134.595	5.17672	3830.77
	125	30 TINS OF MAIZE, 12 TINS RICE	220000	297.297	11.4345	8461.54
	126	3 TINS BEANS, 5 BAGS MAIZE, 1 BAG RICE	154000	208.108	8.00416	5923.08
